# Supplementary material
Source: publisher site journal article supplement (https://www.spandidos-publications.com/7815/downloadSupplementary)

Figure S1. Immunohistochemical staining results. (A) Calponin, (B) PD-L1 negative (magnification, x100); (C) S-100- and (D) TTF-1 negative (magnification, x100). Due to the prolonged storage time, the original slides have faded, resulting in faint staining.

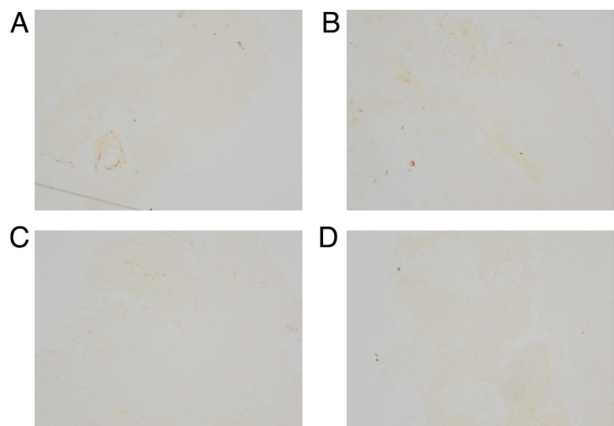

Supplement: Supplementary file 1 [file downloadSupplementary]
